# Supplementary material
Source: publisher figshare collection journal article supplement (https://brill.figshare.com/ndownloader/files/38140566)
Supplement: Supplementary file 1 [file 38140566]

### **List of Online Supplemental Media**

- A. Animation of successive phases of the Menkaure Valley Temple at Giza and associated settlement occupations (based on and adapted from Reisner, *Mycerinus* (1931) and Harvard University-Museum of Fine Arts, Boston Expedition photography). Animation by David Hopkins and the Giza Project at Harvard University.
- B. Visual Construction Summary template (ms Word)
- C. Model Sourcing Document template (ms Word)
- D. Scene Composition Document template (ms Word)
